# Supplementary material for: Antimicrobial use and resistance data in human and animal sectors in the Lao PDR: evidence to inform policy
Source: HighWire-hosted journal article supplement (doi:10.1136/bmjgh-2021-007009), 2021-11-01

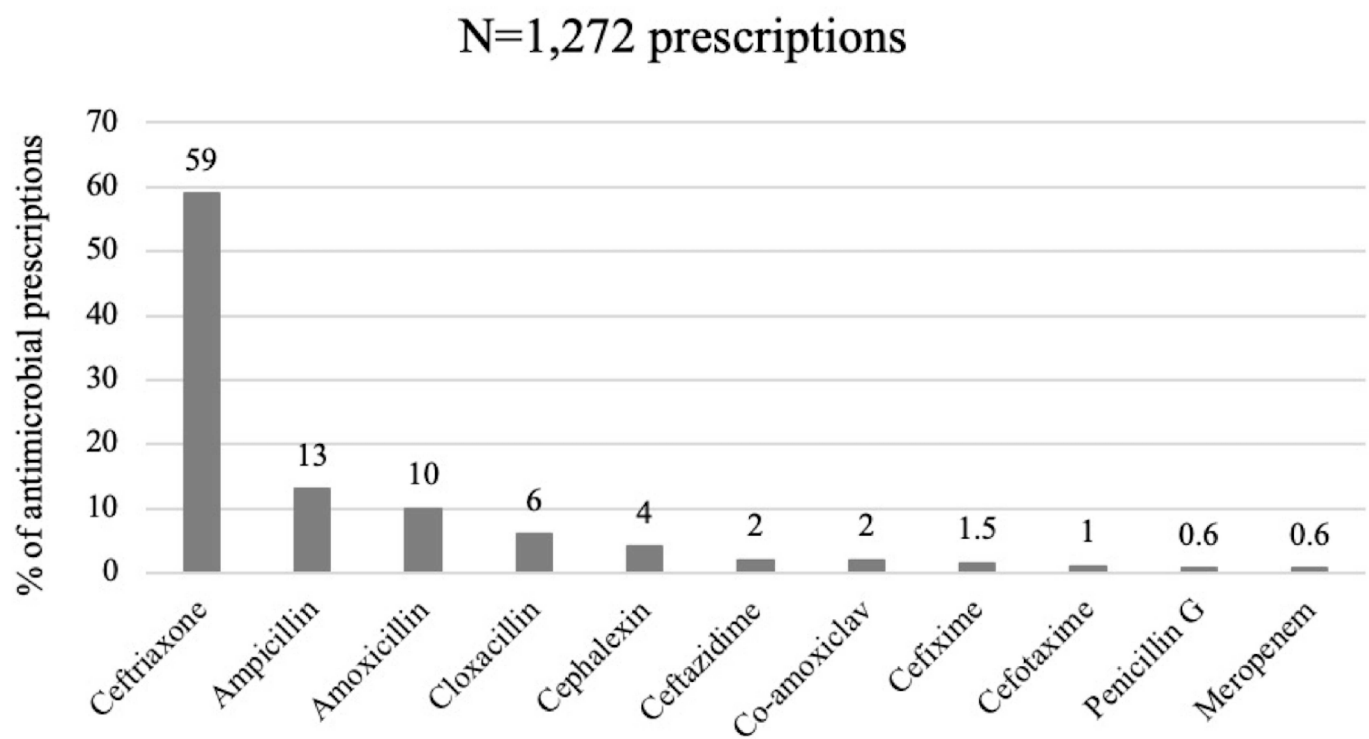

Supplement: bmjgh-2021-007009supp004_data_supplement.pdf [file bmjgh-2021-007009supp004_data_supplement.pdf]
